# Supplementary material
Source: Springer Nature journal article supplement (https://www.springermedizin.de/resource/supplementary/13000_2009_207_MOESM6_ESM.pdf/9624162)

**A**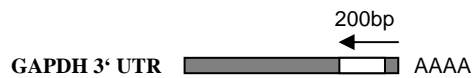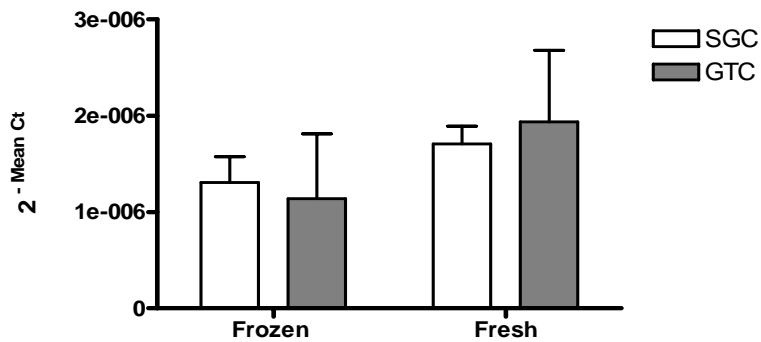**B**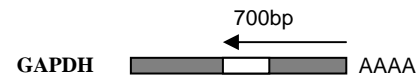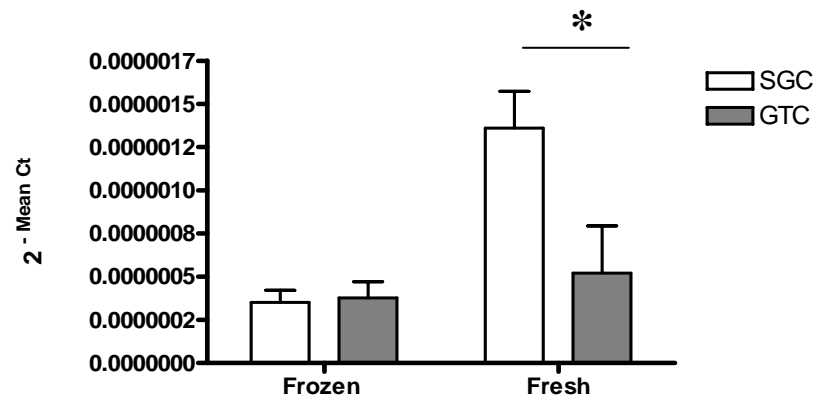**C**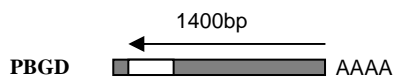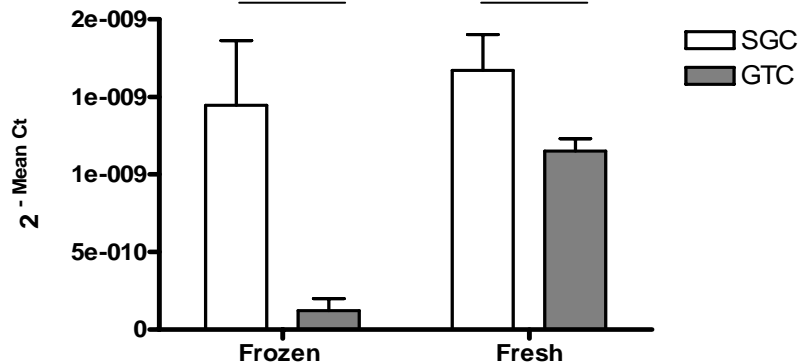

Supplement: MOESM6 [file 9624162]
